# Supplementary material for: MicroRNA-214 and MicroRNA-126 Are Potential Biomarkers for Malignant Endothelial Proliferative Diseases
Source: Int J Mol Sci. 2015 Oct 23;16(10):25377–91. doi: 10.3390/ijms161025377 (PMC4632806; doi:10.3390/ijms161025377)
Supplement: Supplementary file 1 [file ijms-16-25377-s001.pdf]

## Supplementary Information

| Code  | Sex | Age (y,m) | Weight (kg) | Breed                | Histological diagnosis  | Other findings              |
|-------|-----|-----------|-------------|----------------------|-------------------------|-----------------------------|
| HSA1  | CM  | 10y9m     | 23.46       | Golden retriever     | Splenic hemangiosarcoma | -                           |
| HSA2  | M   | 10y8m     | 31.6        | Golden retriever     | Splenic hemangiosarcoma | -                           |
| HSA3  | M   | 5y        | 3.7         | Maltese              | Splenic hemangiosarcoma | -                           |
| HSA4  | CM  | 8y8m      | 7           | Miniature dachshund  | Splenic hemangiosarcoma | -                           |
| HSA5  | CM  | 11y7m     | 15.7        | French bulldog       | Splenic hemangiosarcoma | -                           |
| HSA6  | CM  | 11y1m     | 6.2         | Miniature dachshund  | Splenic hemangiosarcoma | -                           |
| HSA7  | SF  | 8y6m      | 5           | Miniature dachshund  | Splenic hemangiosarcoma | -                           |
| HSA8  | SF  | 13y4m     | 11.06       | Welsh corgi          | Splenic hemangiosarcoma | -                           |
| HSA9  | SF  | 14y6m     | 5           | Miniature schnauzer  | Splenic hemangiosarcoma | -                           |
| HSA10 | SF  | 10y10m    | 2.66        | Miniature dachshund  | Splenic hemangiosarcoma | -                           |
| HM1   | F   | 13y8m     | 5.9         | Papillon             | Hematoma                | -                           |
| HM2   | M   | 15y3m     | 4.12        | Miniature dachshund  | Hematoma                | -                           |
| HM3   | M   | 7y        | 5.38        | Mix                  | Hematoma                | -                           |
| NH1   | F   | 11y1m     | 8.85        | Shiba                | Nodular hyperplasia     | -                           |
| NH2   | CM  | 11y3m     | 7.4         | Jack Russell Terrier | Nodular hyperplasia     | -                           |
| NH3   | M   | 9y        | 15.7        | Welsh corgi          | Nodular hyperplasia     | Extramedullary hematopiesis |
| NH4   | SF  | 9y6m      | 3.4         | Papillon             | Nodular hyperplasia     | -                           |
| SR1   | M   | 9y8m      | 33.9        | Labrador retriever   | Splenorrhagia           | -                           |
| SR2   | M   | 11y9m     | 6.8         | Shih-tzu             | Splenorrhagia           | Extramedullary hematopiesis |
| C1    | SF  | 10y5m     | 12.92       | Beagle               | -                       | -                           |
| C2    | CM  | 10y11m    | 5.24        | Miniature dachshund  | -                       | -                           |
| C3    | M   | 10y       | 5.64        | Miniature dachshund  | -                       | -                           |
| C4    | CM  | 9y4m      | 4.68        | Toy poodle           | -                       | -                           |
| C5    | SF  | 13y       | 3.84        | Miniature dachshund  | -                       | -                           |
| C6    | M   | 11y11m    | 9.4         | Miniature schnauzer  | -                       | -                           |
| C7    | F   | 5y1m      | 4.14        | Toy poodle           | -                       | -                           |
| C8    | SF  | 7y11m     | 4.9         | Toy poodle           | -                       | -                           |
| C9    | M   | 9y8m      | 6.52        | Miniature dachshund  | -                       | -                           |
| C10   | M   | 14y7m     | 11.65       | Mix                  | -                       | -                           |

**Figure S1.** Additional case information. The information of each canine case used in this study regarding their sex, age, weight, breed, and histological diagnosis.
